# Supplementary material for: A Pt(IV) Prodrug Combining Chlorambucil and Cisplatin: A Dual-Acting Weapon for Targeting DNA in Cancer Cells
Source: PubMed Central journal article supplement (PMC6321036; doi:10.3390/ijms19123775), 2018-11-27
Supplement: ijms-19-03775-s001.pdf [file ijms-19-03775-s001.pdf]

# A Pt(IV) Prodrug Combining Chlorambucil and Cisplatin: a Dual-Acting Weapon for Targeting DNA in Cancer Cells

Diego Montagner <sup>1,\*</sup>, Dina Tolan <sup>2,3</sup>, Emma Andriollo <sup>4</sup>, Valentina Gandin <sup>4,\*</sup> and Cristina Marzano <sup>4</sup>

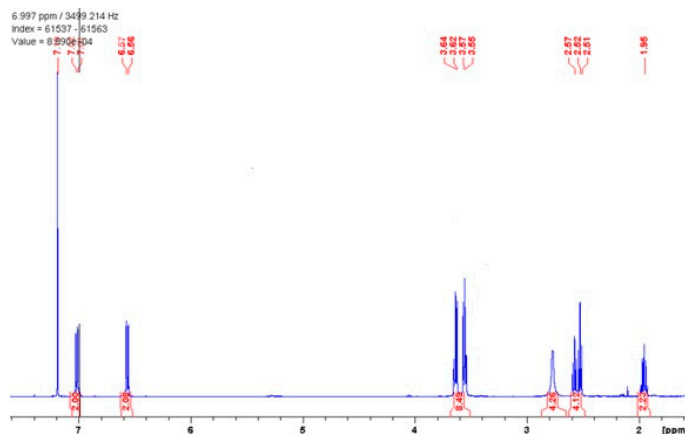

Figure S1. <sup>1</sup>H NMR of Chlorambucil-NHS Ester in CDCl<sub>3</sub>.

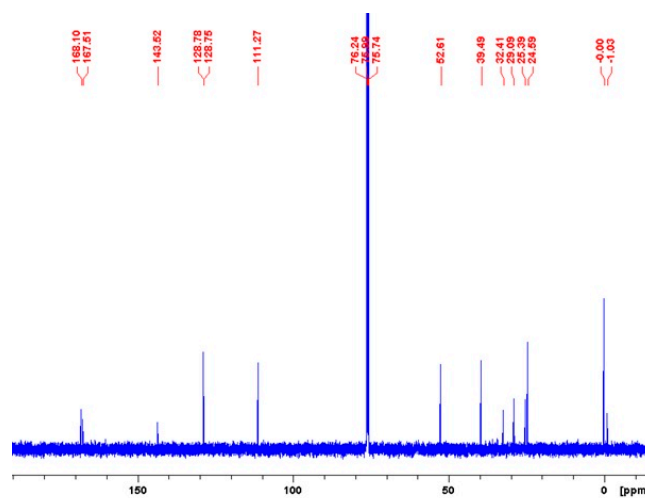

Figure S2. <sup>13</sup>C NMR of Chlorambucil-NHS Ester in CDCl<sub>3</sub>.

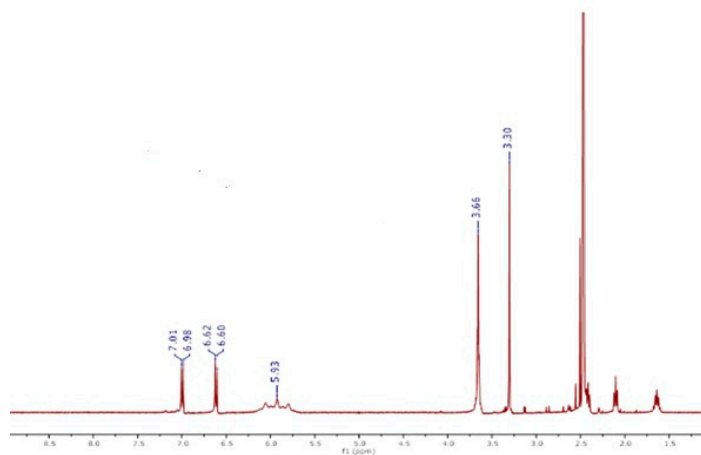

Figure S3.  $^1\text{H}$  NMR of **1** in  $\text{DMSO-}d_6$ .

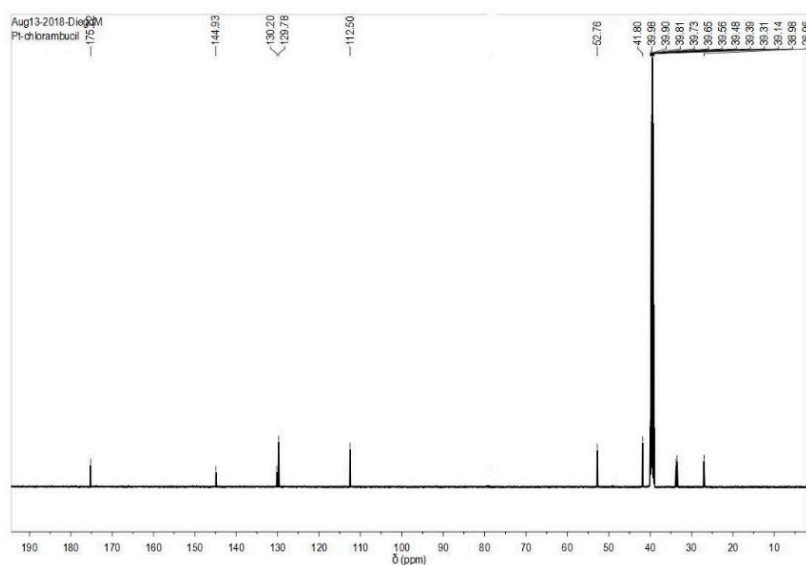

Figure S4.  $^{13}\text{C}$  NMR of **1** in  $\text{DMSO-}d_6$ .

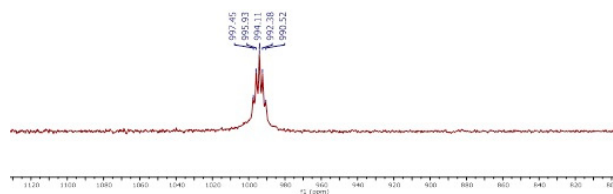

Figure S5.  $^{195}\text{Pt}$  NMR of **1** in  $\text{DMF (D}_2\text{O)}$ .

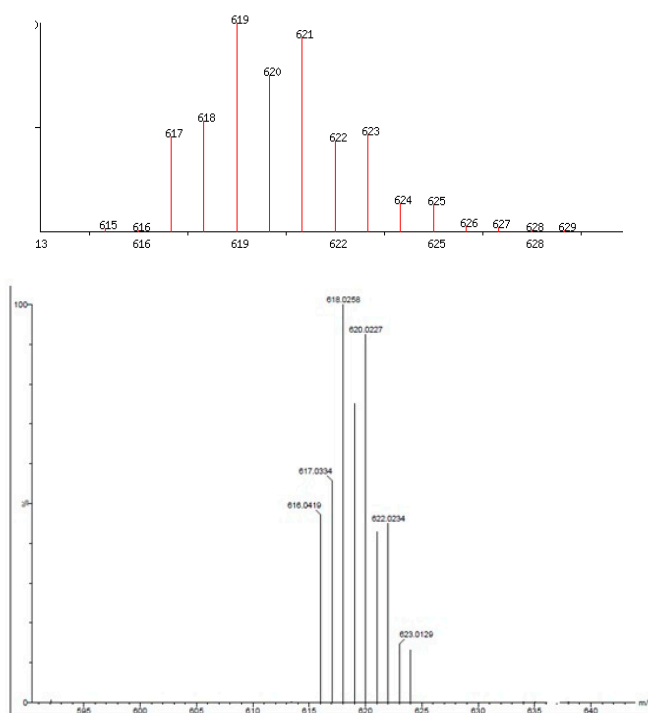

**Figure S6.** Top: simulated ESI Mass spectrum of **1** (-); bottom: ESI Mass spectrum of **1** (-).
